# Supplementary material for: Cytochrome C on a gold surface: investigating structural relaxations and their role in protein–surface electron transfer by molecular dynamics simulations
Source: Royal Society of Chemistry journal article supplement (doi:10.1039/c3cp00146f), 2013-01-01
Supplement: c3cp00146f.pdf [file c3cp00146f.pdf]

# Cytochrome C on a gold surface: investigating structural relaxations and their role for protein-surface electron transfer by molecular dynamics simulations.

Magdalena E. Siwko,<sup>a,b</sup> Stefano Corni<sup>b\*</sup>

<sup>a</sup> Department of Physics, University of Modena and Reggio Emilia, Modena, Italy

<sup>b</sup> Center S3, CNR-Institute of Nanoscience, Modena, Italy; E-mail: stefano.corni@nano.cnr.it

## Electronic Supplementary Information

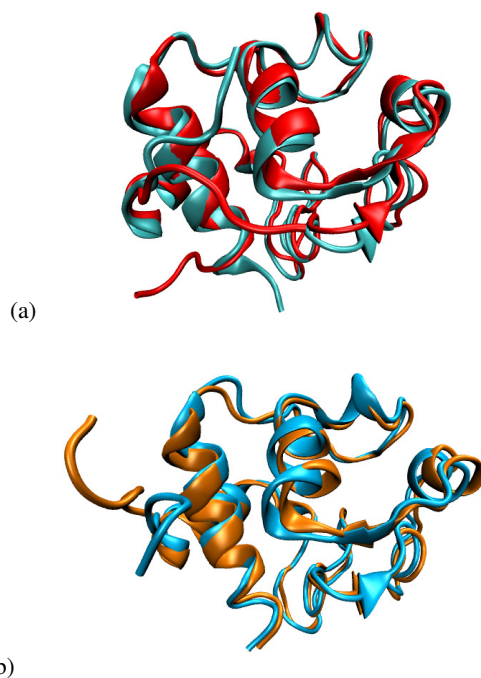

**Figure S1.** Comparison between the protein structures in the final snapshots of the simulations. Panel (a) native YCC in water (cyan) and on gold (red). Panel (b) N67C mutant in water (light-cyan) and on gold (orange).
